# Supplementary material for: Ozone causes substantial reductions in the carbon sequestration of managed European forests
Source: Copernicus journal article supplement (doi:10.5194/egusphere-2024-3742), 2024-12-16

## Ozone causes substantial reductions in the carbon sequestration of managed European forests

Per Erik Karlsson, Patrick Büker, Sam Bland, David Simpson, Sharps, K, Hayes, F, Lisa D. Emberson.

### Supplementary information

**Table S1.** DO<sub>3</sub>SE stomatal flux model parameterisation for each bioregion (NE = Northern Europe; ACE = Atlantic Central Europe; CCE = Continental Central Europe; M = Mediterranean) specific species.

| Parameter          | Units                                                   | Birch (NE) | Norway Spruce (NE) | Temperate Oak (ACE) ** | Scots pine (ACE) ** | Beech (CCE) | Norway spruce (CCE) | Mediterranean Deciduous oak (M) | Mediterranean Evergreen oak (M) |
|--------------------|---------------------------------------------------------|------------|--------------------|------------------------|---------------------|-------------|---------------------|---------------------------------|---------------------------------|
| Canopy height (h)  | m                                                       | 20         | 20                 | 25                     | 20                  | 25          | 20                  | 20                              | 20                              |
| Root depth (RD)    | m                                                       | 1          | 1                  | 1                      | 1                   | 2           | 2                   | 2                               | 2                               |
| Leaf dimension (l) | m                                                       | 0.05       | 0.008              | 0.05                   | 0.008               | 0.07        | 0.008               | 0.042                           | 0.03                            |
| Albedo (A) †       | fraction                                                | 0.16       | 0.12               | 0.16                   | 0.12                | 0.16        | 0.12                | 0.16                            | 0.12                            |
| gmax               | mmol O <sub>3</sub> m <sup>-2</sup> PLA s <sup>-1</sup> | 240        | 125                | 225                    | 190                 | 155         | 130                 | 265                             | 195                             |
| fmin               | fraction                                                | 0.1        | 0.1                | 0.06                   | 0.1                 | 0.13        | 0.16                | 0.13                            | 0.02                            |
| light_a            | fraction                                                | 0.0042     | 0.006              | 0.003                  | 0.006               | 0.006       | 0.01                | 0.006                           | 0.012                           |
| Tmin               | fraction                                                | 5          | 0                  | 0                      | 0                   | 5           | 0                   | 0                               | 1                               |
| Topt               | fraction                                                | 20         | 20                 | 20                     | 20                  | 16          | 14                  | 22                              | 23                              |
| Tmax               | fraction                                                | 200        | 200                | 35                     | 36                  | 33          | 35                  | 35                              | 39                              |
| VPDmax             | fraction                                                | 0.5        | 0.8                | 1                      | 0.6                 | 1           | 0.5                 | 1.1                             | 2.2                             |
| VPDmin             | fraction                                                | 2.7        | 2.8                | 3.25                   | 2.8                 | 3.1         | 3                   | 3.1                             | 4                               |
| SWPmin             | fraction                                                | -1.5       | -1.5               | -1.5                   | -1.5                | -4          | -4                  | -4                              | -4                              |
| SWPmax             | fraction                                                | -0.5       | -0.5               | -0.5                   | -0.5                | -1          | -1                  | -1                              | -1                              |

|                     |          |     |     |     |     |     |     |     |      |
|---------------------|----------|-----|-----|-----|-----|-----|-----|-----|------|
| <b>ASWmin</b>       | % ASW    | 75  | 75  | 75  | 75  | 75  | 75  | 75  | 75   |
| <b>ASWmax</b>       | % ASW    | 100 | 100 | 100 | 100 | 100 | 100 | 100 | 100  |
| <b>LAI at SGS</b>   | m2/m2    | 0   | 5   | 0   | 5   | 0   | 5   | 4   | 4    |
| <b>LAI_b</b>        | m2/m2    | 4   | 5   | 4   | 5   | 4   | 5   | 4   | 4    |
| <b>LAI_c</b>        | m2/m2    | 4   | 5   | 4   | 5   | 4   | 5   | 4   | 4    |
| <b>LAI at EGS</b>   | m2/m2    | 0   | 5   | 0   | 5   | 0   | 5   | 4   | 4    |
| <b>LAI_1</b>        | days     | 15  | 30  | 20  | 30  | 15  | 30  | 20  | 30   |
| <b>LAI_2</b>        | days     | 30  | 30  | 30  | 30  | 20  | 30  | 30  | 30   |
| <b>fphen at SGS</b> | days     | 0   | 0   | 0   | 0.8 | 0.4 | 0   | 0.3 | 1    |
| <b>fphen_b</b>      | fraction | 1   | 1   | 1   | 1   | 1   | 1   | 1   | 1    |
| <b>fphen_c</b>      | fraction | 1   | 1   | 1   | 1   | 1   | 1   | 1   | 0.31 |
| <b>fphen_d</b>      | fraction | 1   | 1   | 1   | 1   | 1   | 1   | 1   | 1    |
| <b>fphen at EGS</b> | fraction | 0   | 0   | 0   | 0.8 | 0.4 | 0   | 0.3 | 1    |
| <b>fphen_1</b>      | days     | 20  | 20  | 15  | 20  | 20  | 0   | 15  | 0    |
| <b>fphen_4</b>      | days     | 30  | 30  | 30  | 40  | 20  | 0   | 20  | 0    |
| <b>Rsoil</b>        | s/m      | 200 | 200 | 200 | 200 | 200 | 200 | 200 | 200  |

N.B. The values come from a variety of sources; those values that are not sourced from UNECE LRTAP Mapping Manual 2017 are indicated as follows: \*\*  
From Bueker et al. 2015; † Simpson et al 2012.

**Table S2.** Details of the selection of species- or PFT-specific DO<sub>3</sub>SE stomatal flux model parameterisation and dose response relationships (DRRs) used for i). GAI and ii). Whole tree biomass for each bioregion. Details are also provided of the associated species coverage by EMEP grid, with the value in parenthesis after each bioregion.

| Bioregion<br>(no. of EMEP<br>grids) | Land cover type                                                             | Stomatal flux model<br>parameterisation                                                                                                                      | GAI DRR<br>( <i>Developed in this<br/>paper</i> )                                                                                     | Whole tree biomass DRR                                                                                                                      | % land cover<br>coverage in<br>bioregion |
|-------------------------------------|-----------------------------------------------------------------------------|--------------------------------------------------------------------------------------------------------------------------------------------------------------|---------------------------------------------------------------------------------------------------------------------------------------|---------------------------------------------------------------------------------------------------------------------------------------------|------------------------------------------|
| Alpine (251)                        | Birch<br>Norway spruce<br>Other deciduous<br>Other coniferous<br>Mixed      | Birch (NE)<br>Norway spruce (NE)<br>Birch (NE)<br>Norway spruce (NE)<br>Birch (NE) & Norway spruce (NE)                                                      | Beech/Birch<br>Norway spruce/Scots<br>pine<br>Broadleaf deciduous<br>Needleleaf<br>Broadleaf deciduous &<br>Needleleaf                | Beech/Birch*<br>Norway spruce*<br>Broadleaf deciduous**<br>Needleleaf **<br>Broadleaf deciduous &<br>Needleleaf**                           | 11%<br>37%<br>19%<br>24%<br>9%           |
| Arctic (4)                          | Birch<br>Mixed                                                              | Birch (NE)<br>Birch & Norway spruce                                                                                                                          | Beech/birch<br>Broadleaf deciduous &<br>Needleleaf                                                                                    | Beech/Birch*<br>Broadleaf deciduous &<br>Needleleaf**                                                                                       | 90%<br>10%                               |
| Atlantic (515)                      | Temperate Oak<br>Scots pine<br>Other deciduous<br>Other coniferous<br>Mixed | Temperate oak (ACE)<br>Scots pine (ACE)<br>Beech (CCE)<br>Norway spruce (CCE)<br>Beech (CCE) & Norway spruce<br>(CCE)                                        | Temperate deciduous<br>oak<br>Norway spruce/Scots<br>pine<br>Broadleaf deciduous<br>Needleleaf<br>Broadleaf deciduous &<br>Needleleaf | Broadleaf deciduous**<br>Needleleaf**<br>Broadleaf deciduous**<br>Needleleaf**<br>Broadleaf deciduous &<br>Needleleaf**                     | 16%<br>13%<br>27%<br>30%<br>15%          |
| Black sea (9)                       | Beech<br>Other deciduous<br>Other coniferous<br>Mixed                       | Beech (CCE)<br>Mediterranean deciduous oak (M)<br>Mediterranean evergreen oak (M)<br>Mediterranean deciduous oak (M)<br>& Mediterranean Evergreen oak<br>(M) | Beech/birch<br>Broadleaf deciduous<br>Aleppo pine/Holm oak<br>Aleppo pine/Holm oak                                                    | Beech/birch*<br>Mediterranean deciduous<br>oak*<br>Mediterranean evergreen*<br>Mediterranean deciduous<br>oak & Mediterranean<br>evergreen* | 23%<br>9%<br>49%<br>20%                  |
| Boreal (416)                        | Birch                                                                       | Birch (NE)                                                                                                                                                   | Beech/birch                                                                                                                           | Beech/birch*                                                                                                                                | 7%                                       |

|                     |                                                                                                        |                                                                                                                                                                                                               |                                                                                                                                          |                                                                                                                                                                                 |                                        |
|---------------------|--------------------------------------------------------------------------------------------------------|---------------------------------------------------------------------------------------------------------------------------------------------------------------------------------------------------------------|------------------------------------------------------------------------------------------------------------------------------------------|---------------------------------------------------------------------------------------------------------------------------------------------------------------------------------|----------------------------------------|
|                     | Norway spruce<br>Scots pine<br>Other deciduous<br>Other coniferous<br>Mixed                            | Norway spruce (NE)<br>Scots pine (ACE)<br>Birch (NE)<br>Norway spruce (NE)<br>Birch (NE) & Norway spruce (NE)                                                                                                 | Norway spruce/Scots pine<br>Norway spruce/Scots pine<br>Broadleaf deciduous<br>Needleleaf<br>Broadleaf deciduous & Needleleaf            | Norway spruce*<br>Norway spruce*<br>Needleleaf**<br>Beech/birch<br>Beech/birch & Norway spruce*                                                                                 | 32%<br>46%<br>9%<br>5%<br>1%           |
| Continental (613)   | Beech<br>Norway spruce<br>Scots pine<br>Other deciduous<br>Other coniferous<br>Mixed                   | Beech (CCE)<br>Norway spruce (CCE)<br>Scots pine (ACE)<br>Beech (CCE)<br>Norway spruce (CCE)<br>Beech (CCE) & Norway spruce (CCE) & Scots pine (ACE)                                                          | Beech/birch<br>Norway spruce/Scots pine<br>Norway spruce/Scots pine<br>Broadleaf deciduous<br>Needleleaf<br>Broadleaf deciduous          | Beech/birch*<br>Norway spruce*<br>Needleleaf**<br>Beech/birch*<br>Norway spruce*<br>Broadleaf deciduous & Needleleaf**                                                          | 13%<br>16%<br>23%<br>18%<br>13%<br>15% |
| Mediterranean (507) | Mediterranean deciduous oak<br>Mediterranean evergreen<br>Other deciduous<br>Other coniferous<br>Mixed | Mediterranean deciduous oak (M)<br>Mediterranean evergreen oak (M)<br>Mediterranean deciduous oak (M)<br>Mediterranean evergreen oak (M)<br>Mediterranean deciduous oak (M) & Mediterranean Evergreen oak (M) | Broadleaf deciduous<br>Aleppo pine/Holm oak<br>Broadleaf deciduous<br>Aleppo pine/Holm oak<br>Broadleaf deciduous & Aleppo pine/Holm oak | Mediterranean deciduous oak*<br>Mediterranean evergreen*<br>Mediterranean deciduous oak*<br>Mediterranean evergreen*<br>Mediterranean deciduous oak* & Mediterranean evergreen* | 4%<br>27%<br>34%<br>22%<br>14%         |
| Pannonian (57)      | Other deciduous<br>Other coniferous<br>Mixed                                                           | Beech (CCE)<br>Norway spruce (CCE)<br>Beech CCE & Norway spruce (CCE)                                                                                                                                         | Broadleaf deciduous<br>Needleleaf<br>Broadleaf deciduous & Needleleaf                                                                    | Broadleaf deciduous**<br>Needleleaf**<br>Broadleaf deciduous** & Needleleaf**                                                                                                   | 41%<br>26%<br>33%                      |
| Steppic             | Beech<br>Temperate oak                                                                                 | Beech (CCE)<br>Temperate Oak (ACE)                                                                                                                                                                            | Beech/birch<br>Oak deciduous                                                                                                             | Beech/birch*<br>Broadleaf deciduous**                                                                                                                                           | 9%<br>23%                              |

|  |                                              |                                                                            |                                                                          |                                                                                  |                   |
|--|----------------------------------------------|----------------------------------------------------------------------------|--------------------------------------------------------------------------|----------------------------------------------------------------------------------|-------------------|
|  | Other deciduous<br>Other coniferous<br>Mixed | Beech (CCE)<br>Norway spruce (CCE)<br>Beech (CCE) & Norway spruce<br>(CCE) | Broadleaf deciduous<br>Needleleaf<br>Broadleaf deciduous &<br>Needleleaf | Broadleaf deciduous**<br>Needleleaf**<br>Broadleaf deciduous** &<br>Needleleaf** | 29%<br>19%<br>20% |
|--|----------------------------------------------|----------------------------------------------------------------------------|--------------------------------------------------------------------------|----------------------------------------------------------------------------------|-------------------|

N.B. \* DRRs from UNECE LRTAP Mapping Manual 2017; \*\* DRRs from Bueker et al. 2015.

Table S3. Dose response relationships (DRRs) for POD<sub>1</sub>SPEC for i. GAI and ii. Whole tree biomass by bioregion specific species.

| Bioregion specific species | GAI DRRs                | R <sup>2</sup> | Whole tree biomass DRRs | R <sup>2</sup> |
|----------------------------|-------------------------|----------------|-------------------------|----------------|
| Beech/Birch                | $y = -0.0093x + 0.9461$ | 0.59           | $y = -0.0093x + 1.002$  | 0.67           |
| Norway spruce              | -                       |                | $y = -0.0022x + 0.998$  | 0.31           |
| Norway spruce/Scots pine   | $y = -0.0057x + 1.0015$ | 0.56           | -                       |                |
| Oak (deciduous)            | $y = -0.0057x + 1.0167$ | 0.75           | -                       |                |
| Aleppo pine/Holm oak       | $y = -0.0047x + 1.001$  | 0.64           | -                       |                |
| Mediterranean oak          | -                       |                | $y = -0.0032x + 1.003$  | 0.41           |
| Mediterranean evergreen*   | -                       |                | $y = -0.0009x + 0.998$  | 0.42           |
| <b>PFTs</b>                |                         |                |                         |                |
| Broadleaf deciduous        | $y = -0.0066x + 0.9381$ | 0.47           | $y = -0.0057x + 0.9388$ | 0.42           |
| Needleleaf                 | $y = -0.0052x + 0.999$  | 0.69           | $y = -0.0044x + 0.9988$ | 0.68           |

N.B. \*Refers to above ground biomass

Relative GAI DRRs for all species and PFTs.

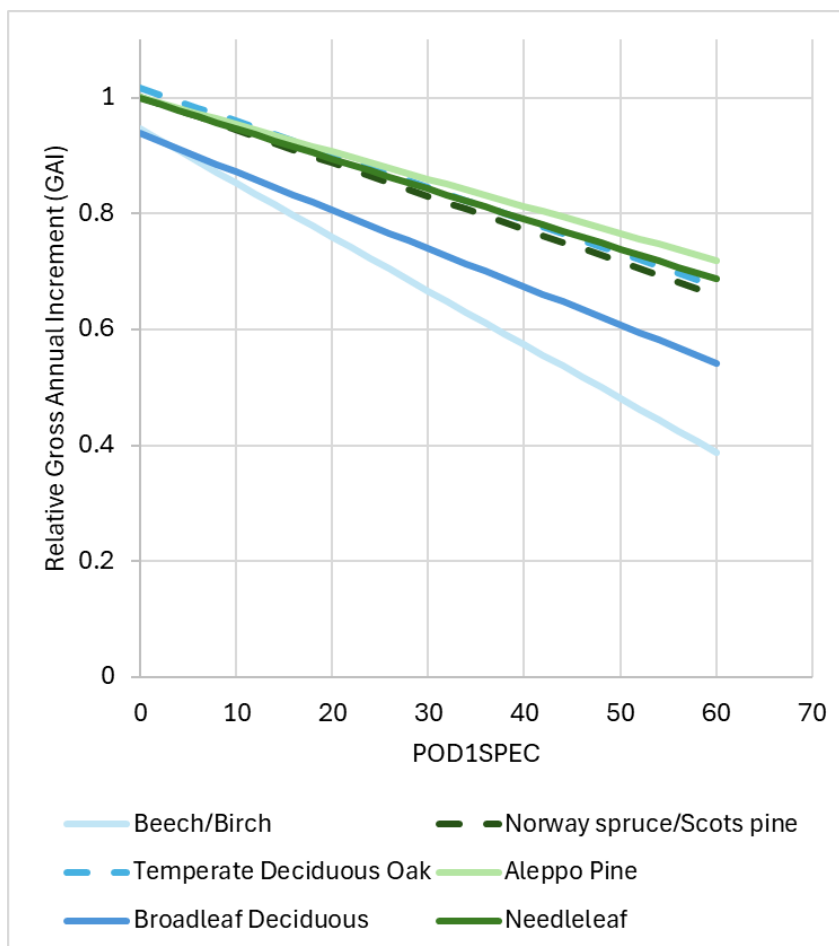

**Figure S1.** The ‘default’, ‘minimum’ (min) and ‘maximum’ (max) parameterisations of the Richards equation (Richards, 1959; Nishizono, 2010) in relation to European Forest data collected from the literature representing five countries (Sweden (S), Finland (FIN), Austria (AT), Switzerland (CZ) and Germany (G)); and 6 forest genera (*Pinus*, *Betula*, *Picea*, *Larix*, *Fagus*, *Abies*) (c.f. Fellner & Rechberger, 2009; Mund et al., 2002). All biomass data are scaled to equal 1 at a stand age of 100 years to allow comparison of the growth profiles.

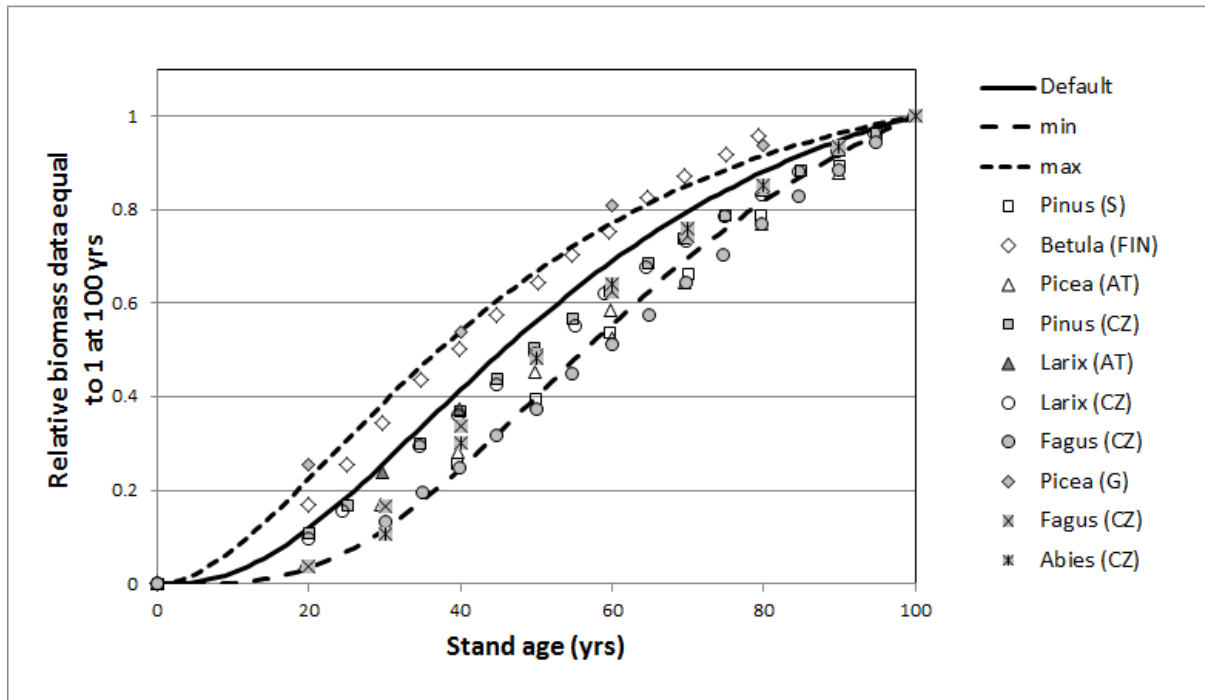

**Figure S2.** The spatial distribution of the estimated  $POD_1SPEC$  across Europe assuming no soil water stress (NSW), separately for coniferous and deciduous tree species for annual mean values for the period 2008-2012 (a, c) and as the difference in maximum and minimum  $POD_1SPEC$  values across the years 2008-2012 (b, d).

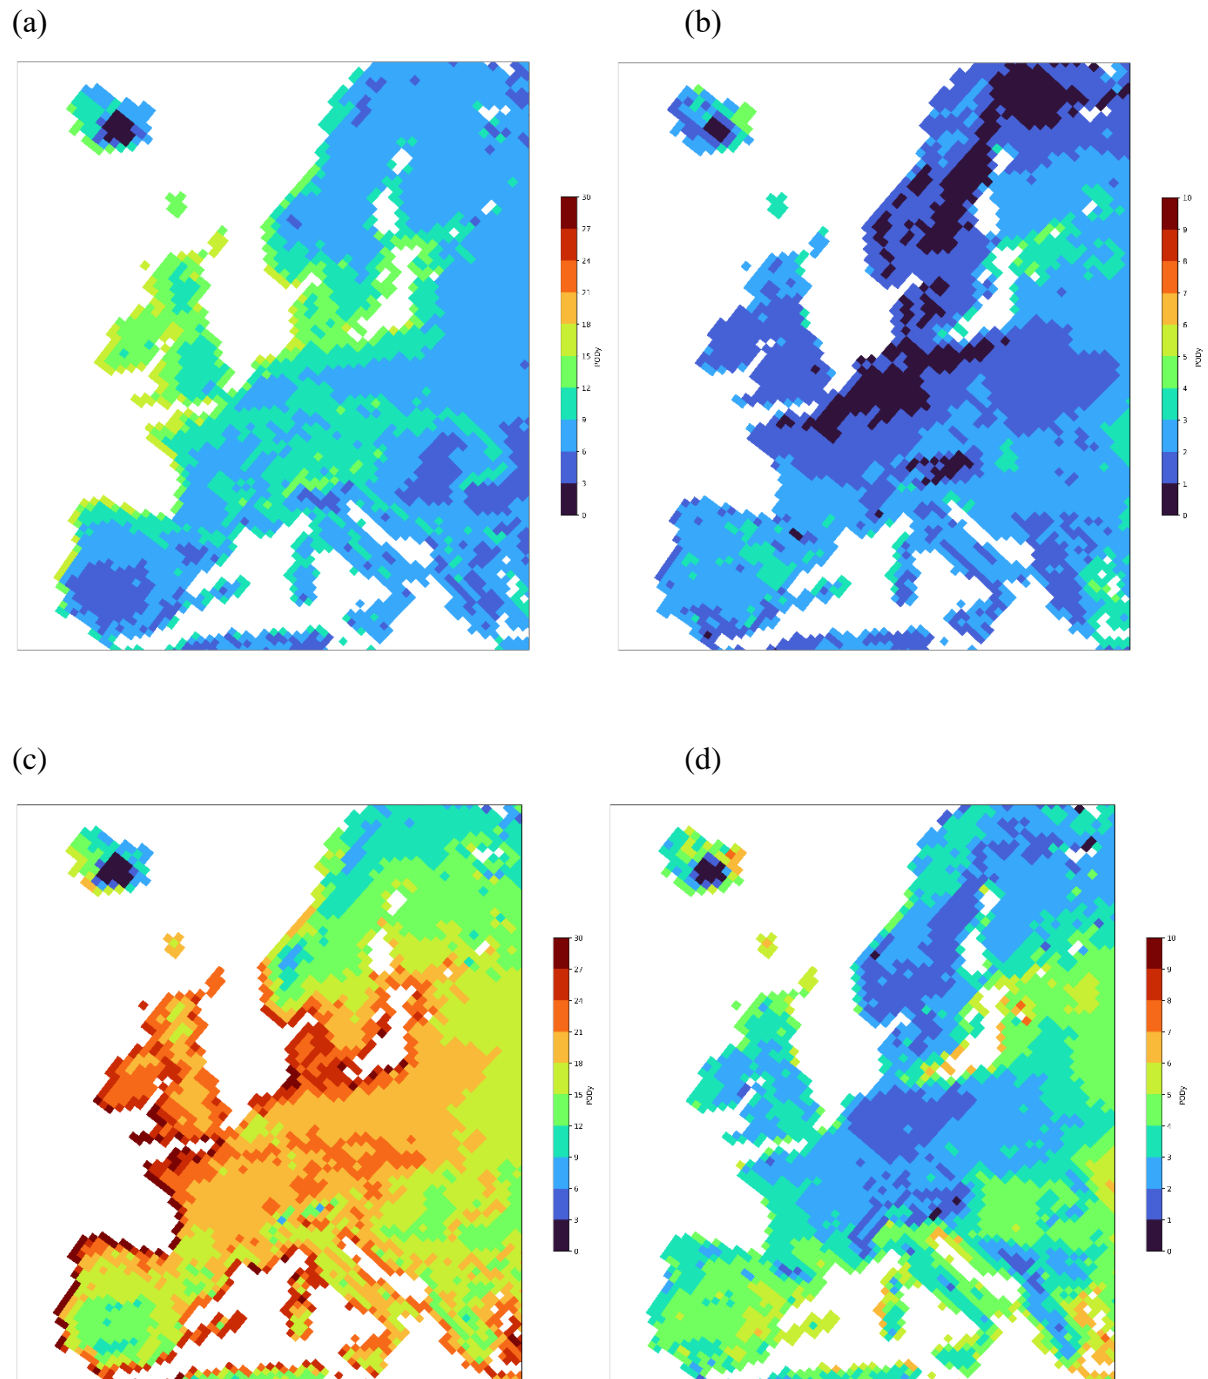



**Figure S3.** Dose-response relationships based on POD<sub>1</sub>SPEC for assessments based on the estimated impacts on tree growth rates (Relative GAI) for other species and PFT dose-response relationships.

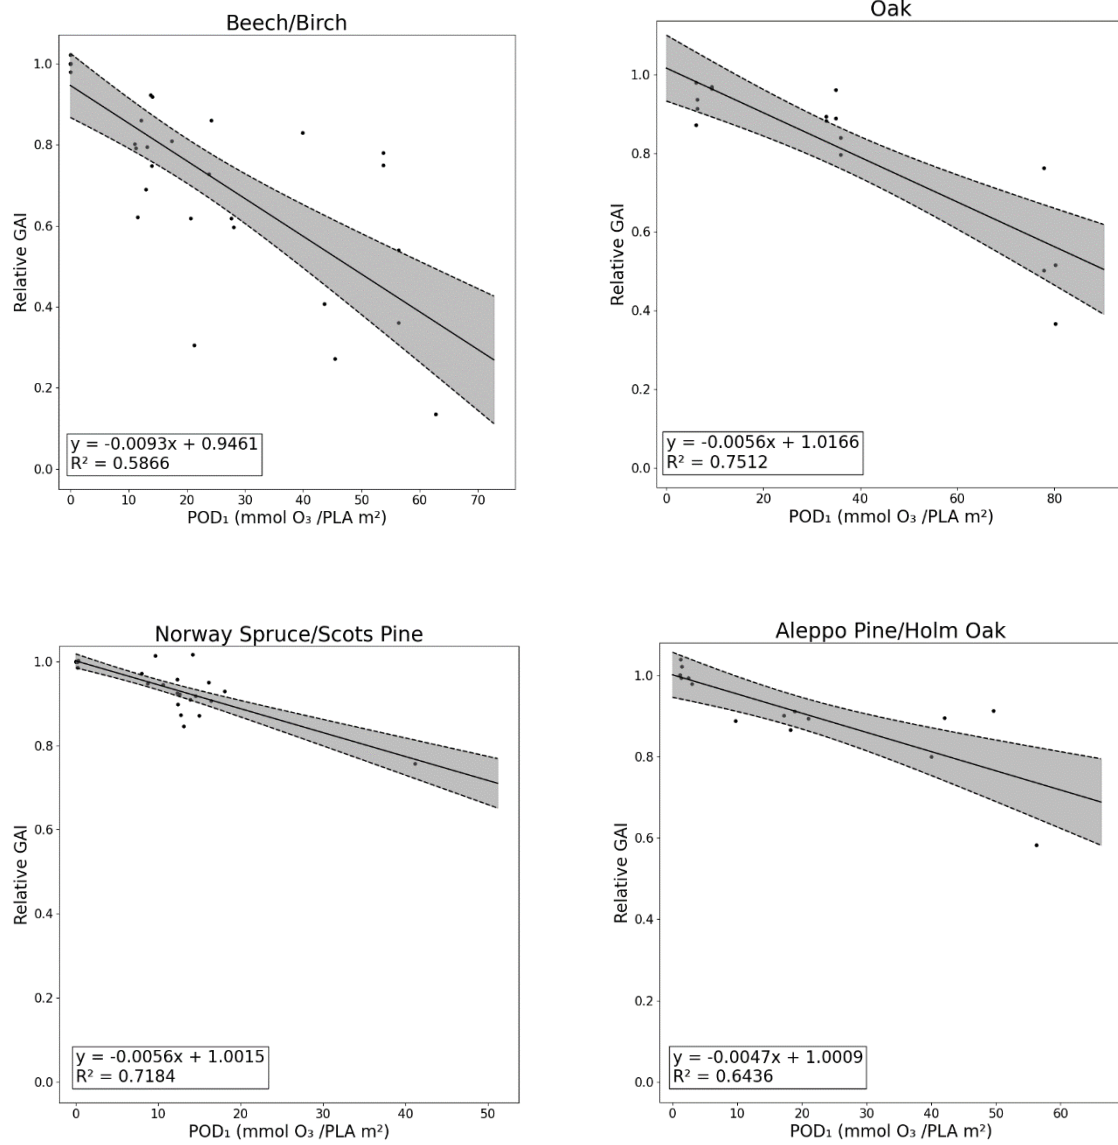

**Figure S4a.** The limits to  $POD_{1SPEC}$  from  $f_{temp}$  for individual species and all years (2008-2012) across Europe. Colour scale from red (1) to blue (0).

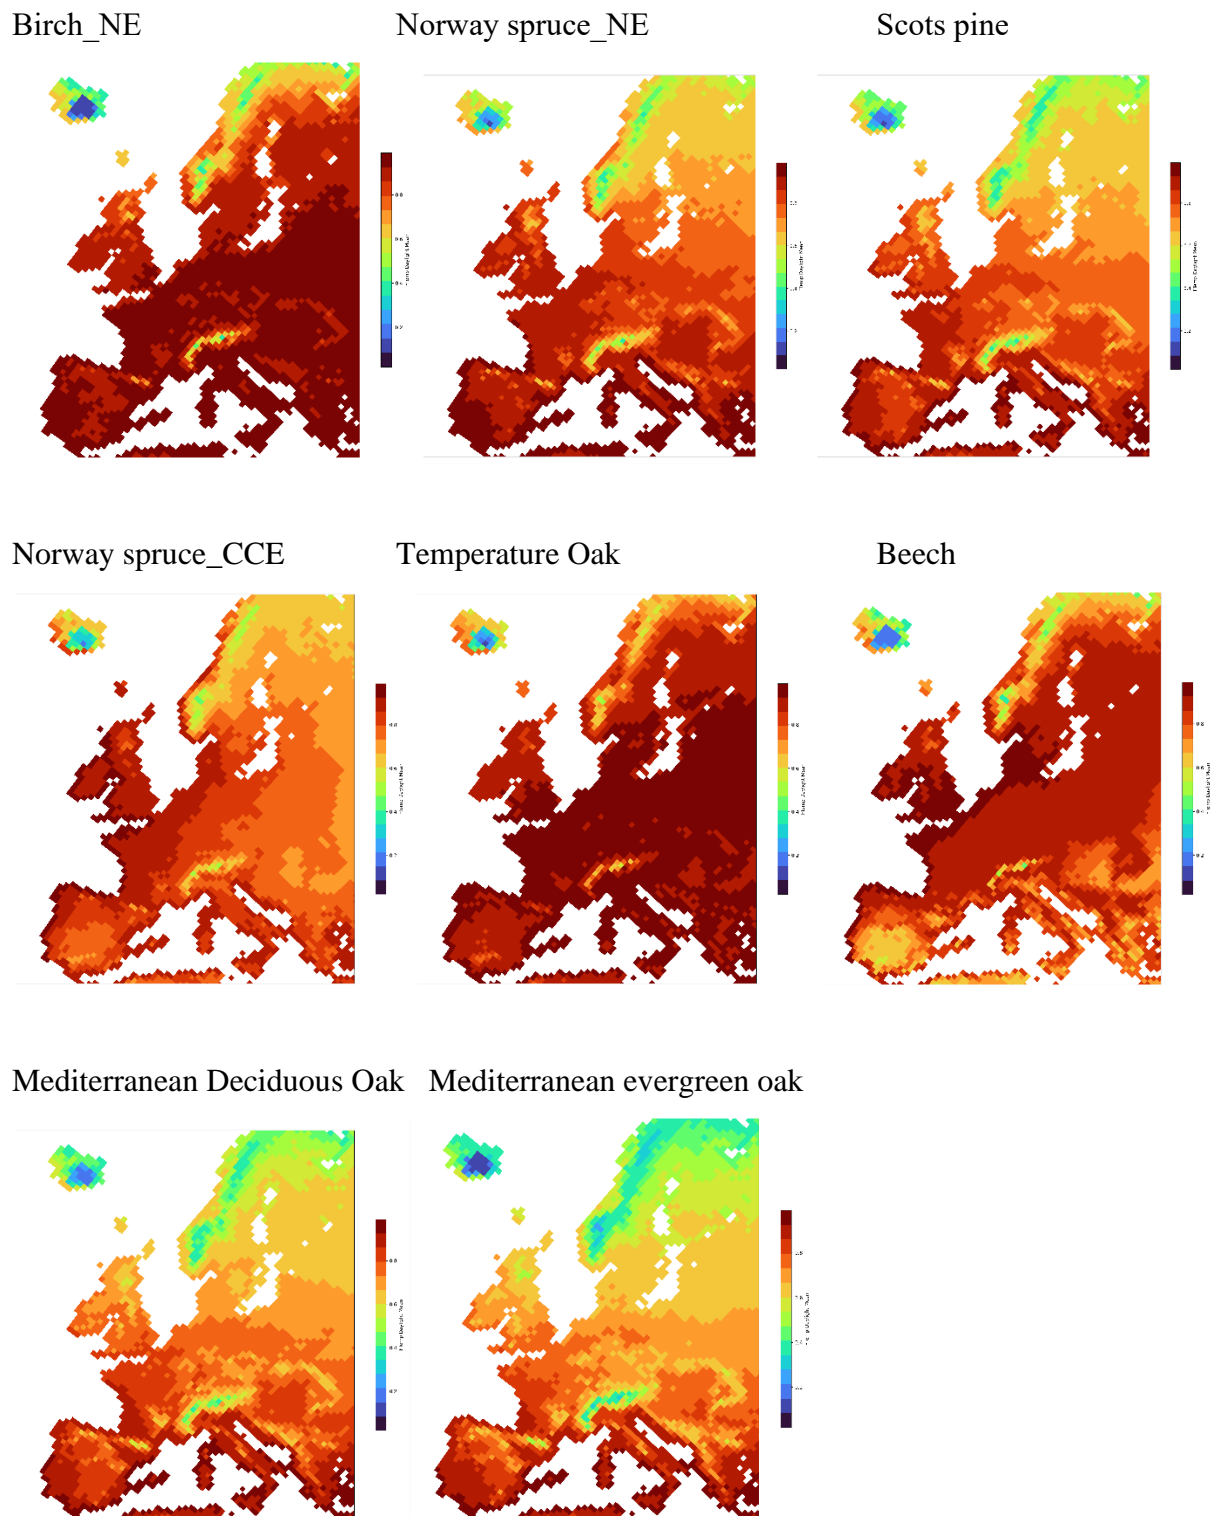

**Figure S4b.** The limits to  $POD_1SPEC$  from  $f_{VPD}$  for individual species and all years (2008-2012) across Europe. Colour scale from red (1) to blue (0).

Birch\_NE

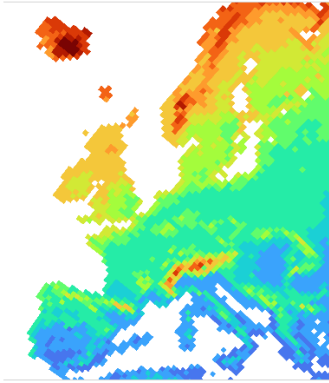

Norway spruce\_NE

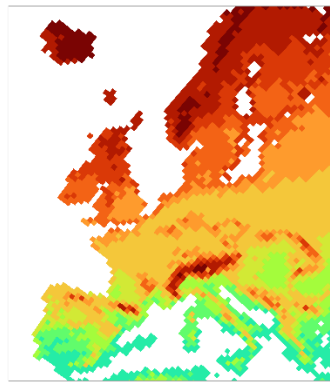

Scots pine

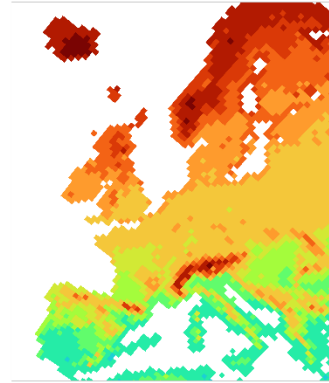

Norway spruce\_CCE

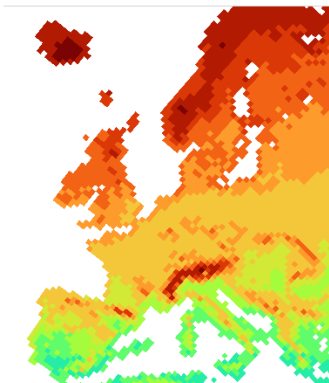

Temperature Oak

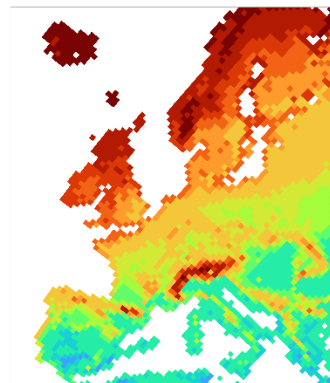

Beech

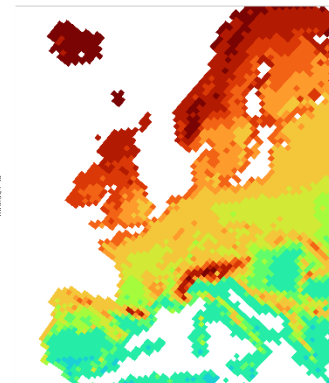

Mediterranean Deciduous Oak Mediterranean evergreen oak

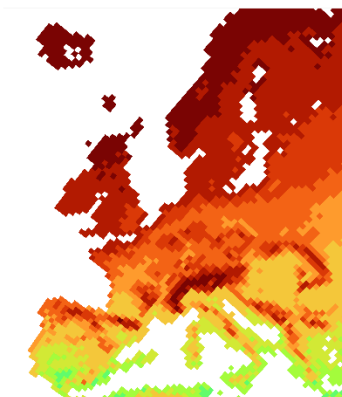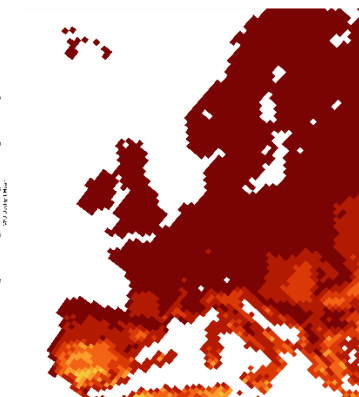

**Figure S4c.** The limits to  $POD_1SPEC$  from  $f_{PAW}$  (where  $g_{sto}$  reduces on exceedance of 75% of available soil water) for individual species and all years (2008-2012) across Europe. Colour scale from red (1) to blue (0).

Birch\_NE

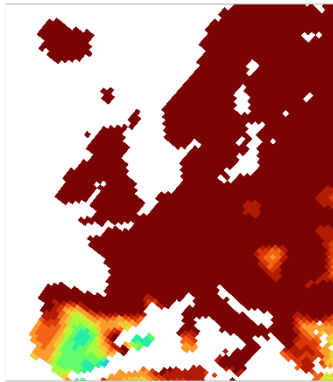

Norway spruce\_NE

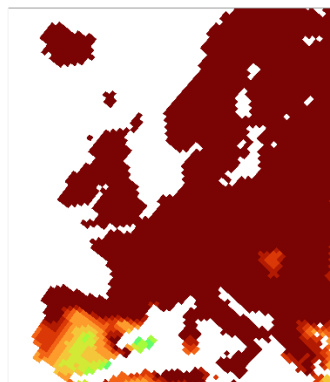

Scots pine

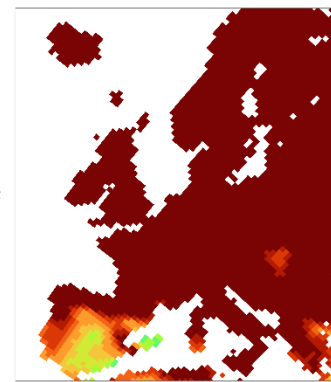

Norway spruce\_CCE

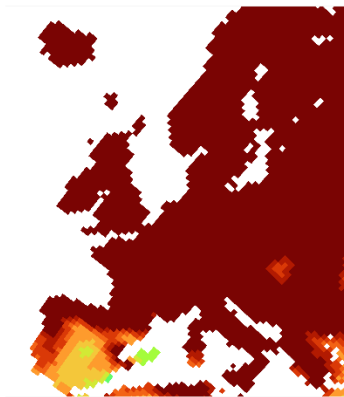

Temperature Oak

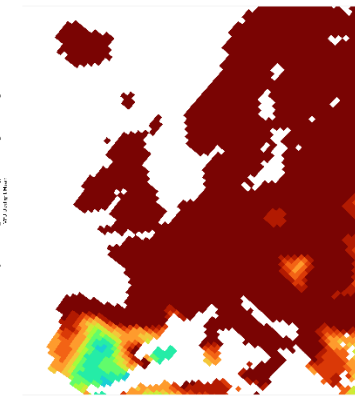

Beech

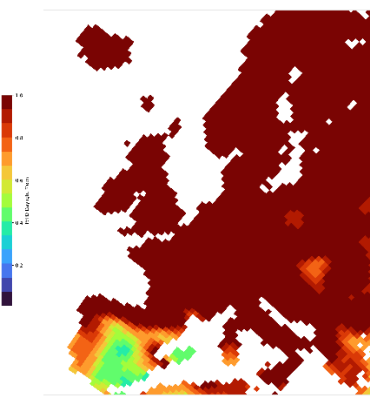

Mediterranean Deciduous Oak

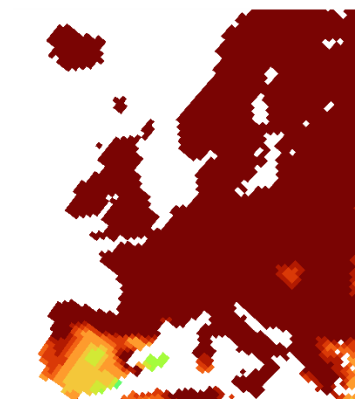

Mediterranean evergreen oak

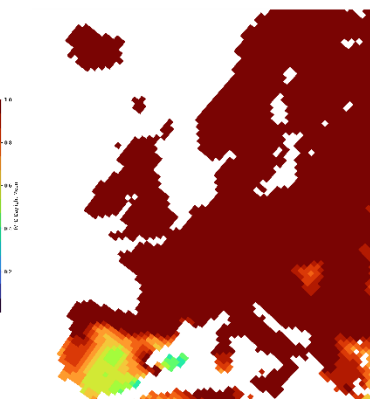

**Figure S4d.** The limits to  $POD_1SPEC$  from  $f_{PAW}$  with a more sensitive relationship where  $g_{sto}$  reduces on exceedance of 50% of available soil water for individual species and for the year 2012 only across Europe. Colour scale from red (1) to blue (0).

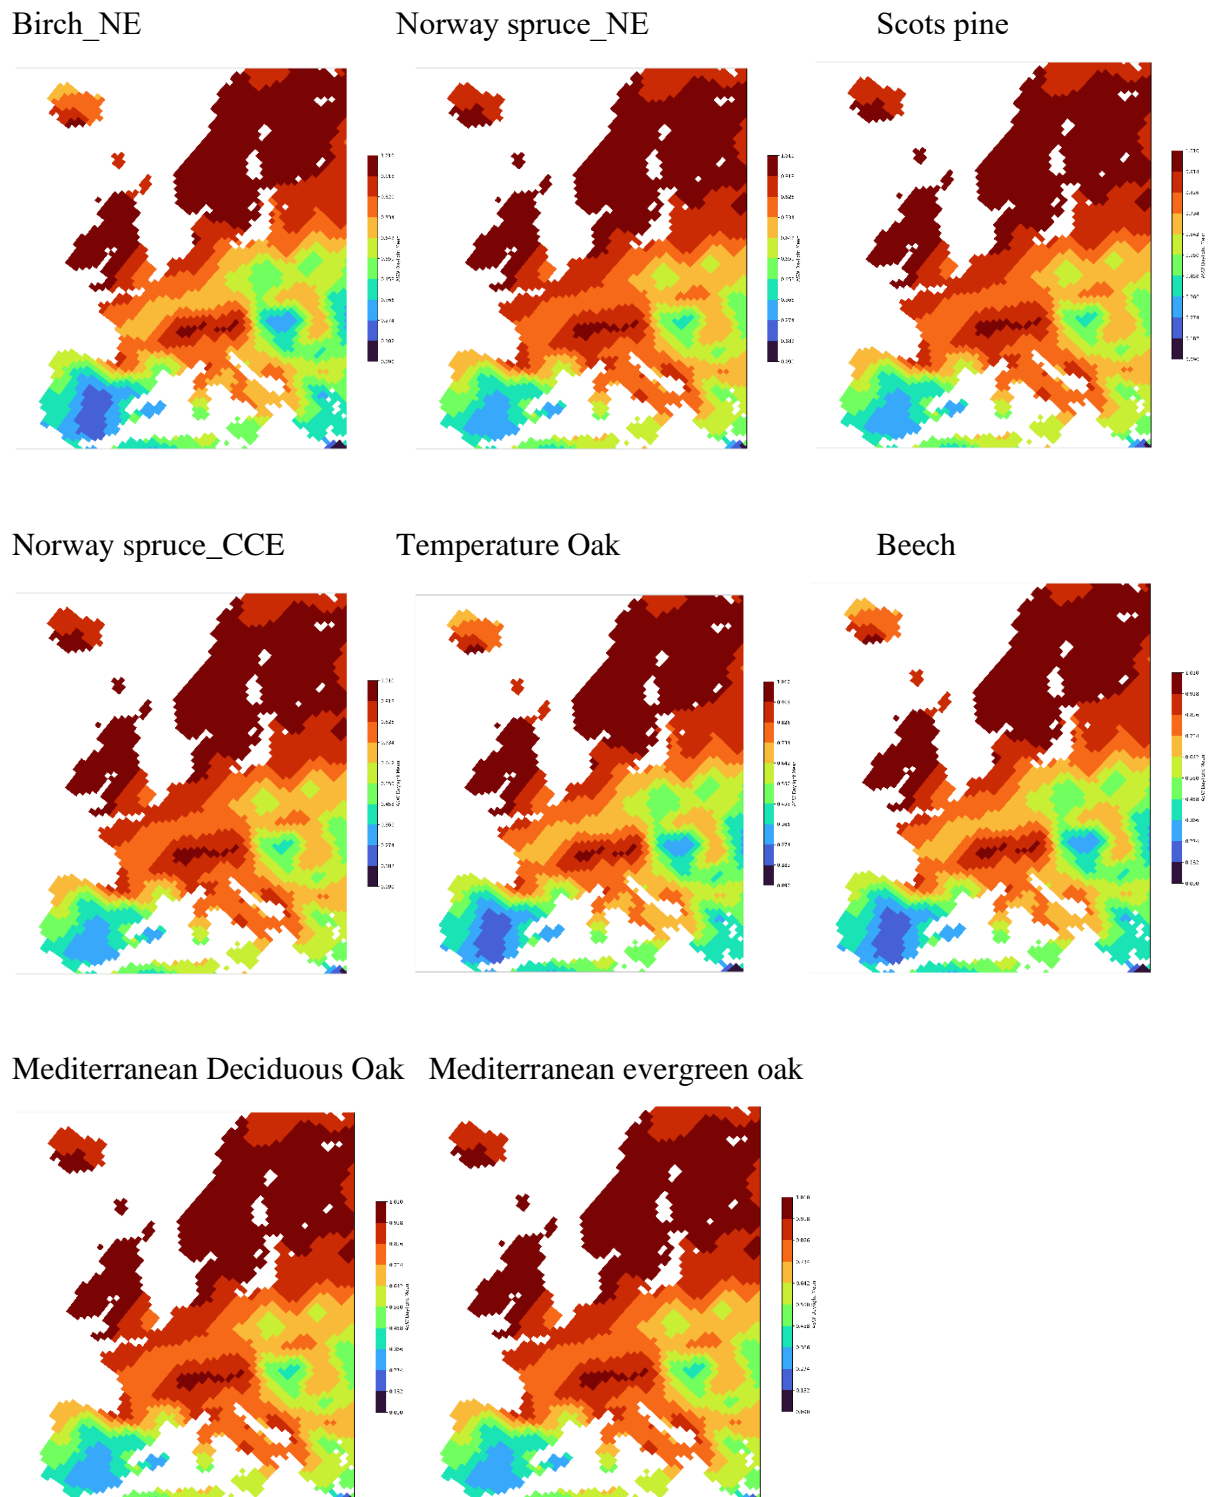

Supplement: Supplementary file 1 [file egusphere-2024-3742-supplement.pdf]
